# Supplementary material for: Increased SUMO-activating enzyme SAE1/UBA2 promotes glycolysis and pathogenic behavior of rheumatoid fibroblast-like synoviocytes
Source: JCI Insight. 2020 Sep 17;5(18):e135935. doi: 10.1172/jci.insight.135935 (PMC7526534; doi:10.1172/jci.insight.135935)
Supplement: Supplemental data [file jciinsight-5-135935-s080.pdf]

## Supplementary data for figure legends, figures and Tables

**Fig. S1 Effect of TNF $\alpha$  inhibitor etanercept (ETN) on expression of SAE1 and UBA2 in RA FLSs.** RA FLSs were treated with various concentration of ETN (100, 500, 1000  $\mu$ g/ml) for 48 h. **(A)** Effect of ETN on viability of RA FLSs. Cell viability was measured by MTT test. **(B and C)** Effect of ETN on expression of SAE1 and UBA2. Expression of SAE1 and UBA2 was measured by Western blot analysis. Data are expressed as the mean  $\pm$  SD of densitometry quantification (C) from 5 independent experiments of 5 different patients. \* $P < 0.05$  versus control (CTRL) by 1-way ANOVA

**Fig. S2 Expression of SAE1 and UBA2 in synovial T cells (CD3+) and macrophages (CD68+) from patients with RA.** The expression of CD3, CD68, SAE1, UBA2 and nuclei was evaluated by immunofluorescence staining using fluorescence microscopy, and representative images from three independent experiments are shown. Original magnification, 400 $\times$

**Fig. S3 Efficiency of SAE1/UBA2 knockdown.** RA FLSs were transfected with SAE1 or UBA2 siRNA 1–3 for 48 h and subjected to RT-qPCR analysis (A) and Western blotting (B). Data shown are the mean  $\pm$  SD from 3 independent experiments. \* $P < 0.05$  versus control siRNA (siC), by 1-way ANOVA

**Fig. S4 Effect of SAE1/UBA2 knockdown on migration, invasion and the expression of proinflammatory cytokines in HC FLSs.** HC FLSs were transfected with SAE1 or UBA2 siRNAs or siC for 48 h. **(A)** Chemotactic migration of HC FLSs was evaluated using a Transwell assay. **(B)** *In vitro* invasion was determined using inserts coated with Matrigel Basement Membrane Matrix. The relative invasion rate was calculated by counting invaded cells and normalizing to the siC-treated cells. Representative images (left panel) are shown (original magnification, 100 $\times$ ). Data (right panel) are expressed as the mean  $\pm$  SD of 3 independent experiments from 3 different HC subjects. **(C)** Effect of SAE1/UBA2 suppression on the proliferation of HC FLSs. An EdU incorporation assay was used to measure cell proliferation. Representative images show proliferation of RA FLSs labeled with EdU (red) and nuclei stained with Hoechst 33342 (blue) (original magnification, 100 $\times$ ). Graphs indicate the mean  $\pm$  SD of 4 independent experiments involving 4 different HC subjects. **(D)** Effect of SAE1 or

UBA2 inhibition on apoptosis of RA FLSs. The cellular apoptosis rate was evaluated by annexin V and PI staining and measured by flow cytometry. Representative flow plots are shown. The apoptosis represents the mean  $\pm$  SD percentage of 3 independent experiments of 3 different HC subjects. (E) Effect of SAE1/UBA2 inhibition on TNF- $\alpha$ -induced expression of IL-1 $\beta$ , IL-6 and IL-8. Cytokine expression was evaluated by RT-qPCR. Ct values were normalized to  $\beta$ -actin values. Data are presented as the mean  $\pm$  SD from 4 independent experiments of 4 different HC subjects. \* $P$  < 0.05 versus siC, by 1-way ANOVA

**Fig. S5 Effect of SAE1/UBA2-mediated SUMOylation inhibition on HK and PFK activity.** RA FLSs were transfected with siRNA-1 and siRNA-3 for SAE1 (siSAE1-1, siSAE1-3) or UBA2 (siUBA2-1, siUBA2-3) or siC for 48 h or pretreated with GA (150  $\mu$ M) for 24 h and then stimulated with or without TNF- $\alpha$  (10 ng/ml) for 24 h. Enzymatic activity was detected by the indicated kits. Data are expressed as the mean  $\pm$  SD from 4 independent experiments. \* $P$  < 0.05 versus siC or DMSO, by 1-way ANOVA

**Fig. S6 Effect of GA on TNF- $\alpha$ -induced translocation of PKM2 in RA FLSs.** RA FLSs were pretreated with GA (150  $\mu$ M) for 24 h and then stimulated with or without TNF- $\alpha$  (10 ng/ml) for 12 h. For cellular IF staining, PKM2 (green) and nuclei (blue) were evaluated using fluorescence microscopy, and representative images from three independent experiments are shown. Original magnification, 400 $\times$ .

**Fig. S7 Effect of SKN on TNF- $\alpha$ -induced translocation of PKM2 in RA FLSs.** RA FLSs were pretreated with SKN (2  $\mu$ M) for 24 h and then stimulated with or without TNF- $\alpha$  (10 ng/ml) for 12 h. For cellular IF staining, PKM2 (green) and nuclei (blue) were evaluated using fluorescence microscopy, and representative images from three independent experiments are shown. Original magnification, 400 $\times$ .

**Fig. S8 Measurement of SUMO-1-PKM2 interactions in RA FLSs.** Immunoprecipitations were performed as described in the *Materials and Methods*. The precipitates were separated by SDS-PAGE, and Western blotting was performed using anti-PKM2 (right, upper panel) and anti-SUMO-1 antibodies (right, lower panel). Input controls are shown as indicated (left panel).

**Fig. S9 Effect of GA treatment on SUMO-1-PKM2 interactions.** Cells were treated with GA for 24 h. The immunoprecipitates were probed with anti-PKM2 (upper panels) or anti-SUMO-1 (lower panels) antibody. Immunoprecipitations were also performed with IgG as a negative control. Input controls are shown as indicated (left panel).

**Fig. S10 Expression of phosphorylated PKM2 (p-PKM2) in FLSs and synovial tissue from RA patients and healthy control (HC) subjects.** **A**, Expression of p-PKM2 in FLSs was measured by Western blot analysis. Data are expressed as the mean  $\pm$  SD of densitometry quantification (right panel) from 5 independent experiments of 5 different patients. \* $P < 0.05$  versus HC, by Student's  $t$  test. **B**, The expression of p-PKM2 in synovial tissue from RA patients and HC subjects was detected by immunohistochemical staining. A representative image was shown from 5 RA patients or 5 HC subjects. Original magnification, 400 $\times$

**Fig. S11 Efficiency of p-PKM2 knockdown.** RA FLSs were transfected with PKM2 siRNA 1-3 for 48 h and subjected to RT-qPCR analysis (**A**) and Western blot (**B**). A representative blot of at least 3 independent experiments is shown. The data shown are the mean  $\pm$  SD from at least 3 independent experiments. \* $P < 0.05$  versus siC, by 1-way ANOVA

**Fig. S12 Effect of PKM2 knockdown on migration, invasion and the expression of IL-1 $\beta$ , IL-6 and IL-8 in RA FLSs.** RA FLSs were transfected with siRNA-2 and siRNA-3 for PKM2 (siPKM2-2, siPKM2-3) or siC. **A** and **B**, Effect of PKM2 knockdown on migration and invasion. Migration (**A**) and invasion (**B**) were measured with a Boyden chamber. An invasion assay was performed using inserts coated with a Matrigel basement membrane matrix. The migrated or invaded FLSs were stained violet using a Diff-Quick kit (left panel, original magnification, 100 $\times$ ). The migration or invasion index represents the number of migrated or invaded cells normalized to siC-treated cells. Data show the mean  $\pm$  SD for samples from 4 different RA patients. **C**, Effect of PKM2 knockdown on the expression of IL-1 $\beta$ , IL-6 and IL-8. Cytokine expression was measured by RT-qPCR analysis. Data show the mean  $\pm$  SD for samples from 5 different RA patients. \* $P < 0.05$ , versus siC; <sup>#</sup> $P < 0.05$  versus TNF- $\alpha$  + siC, by 1-way

ANOVA

**Fig. S13 Effect of PKM2 knockdown on lactate secretion, glucose uptake and the expression of LDHA, PDK1, and GLUT1.** RA FLSs were transfected with siRNA-2 and siRNA-3 for PKM2 (siPKM2 -2, siPKM2 -3) or siC, and then stimulated with or without TNF- $\alpha$  (10 ng/ml) for 24 h. **A**, Effect of PKM2 knockdown on lactate secretion. Lactate levels in the supernatants of cultured RA FLSs were detected using a Lactate Colorimetric Assay Kit. **B**, Effect of PKM2 knockdown on glucose uptake. Glucose uptake was detected using a colorimetric glucose uptake assay kit. **C-E**, Effect of PKM2 knockdown on the expression of LDHA (**C**), PDK1 (**D**) and GLUT1 (**E**). The expression of LDHA, PDK1 and GLUT1 was measured by RT-qPCR. The data are representative of at least 3 independent experiments (mean  $\pm$  SD). \* $P < 0.05$ , versus siC; # $P < 0.05$  versus TNF- $\alpha$  + siC, by 1-way ANOVA

**Fig. S14 Effect of shikonin (SKN) treatment on the phosphorylation of PKM2.** The expression of p-PKM2 was measured by Western blot analysis. **A**, RA FLSs were treated with SKN (2  $\mu$ M) for various time points (6, 12, 24, 48 h). **B**, RA FLSs were pretreated with SKN for 24 h and then stimulated with or without TNF $\alpha$  (10 ng/ml) for 30 min. Data are expressed as the mean  $\pm$  SD of densitometry quantification (lower panels) from 3 independent experiments of 3 different patients. \* $P < 0.05$  versus DMSO, # $P < 0.05$  versus TNF- $\alpha$  + DMSO, by 1-way ANOVA

**Fig. S15 Effect of shikonin (SKN) on migration, invasion and the expression of IL-1 $\beta$ , IL-6 and IL-8 by RA FLSs.** RA FLSs were pretreated with SKN for 24 h and then stimulated with or without TNF- $\alpha$  (10 ng/ml) for the indicated times. **A** and **B**, Effect of SKN treatment on migration and invasion. Migration (**A**) and invasion (**B**) were measured with a Boyden chamber. An invasion assay was performed using inserts coated with a Matrigel basement membrane matrix. The migrated or invaded FLSs were stained violet using a Diff-Quick kit (left panel, original magnification, 100 $\times$ ). The migration or invasion index represents the number of migrated or invaded cells normalized to DMSO-treated cells. **C**, Effect of SKN treatment on the expression of IL-1 $\beta$ , IL-6 and IL-8. Cytokine expression was measured by RT-qPCR analysis. Data show the mean  $\pm$  SD for samples from at least 3 different RA patients.\* $P < 0.05$

versus DMSO, <sup>#</sup>*P*<0.05 versus TNF- $\alpha$  + DMSO, by Student's *t* test (for panel A and B) or 1-way ANOVA (for panel C)

**Fig. S16 Effect of shikonin (SKN) on lactate secretion, glucose uptake and the expression of LDHA, PDK1, and GLUT1.** RA FLSs were pretreated with SKN for 24 h and then stimulated with or without TNF- $\alpha$  (10 ng/ml) for the indicated times. **A**, Effect of SKN treatment on lactate secretion. Lactate levels in the supernatants of cultured RA FLSs were detected using a Lactate Colorimetric Assay Kit. **B**, Effect of SKN treatment on glucose uptake. Glucose uptake was detected using a colorimetric glucose uptake assay kit. **C-E**, Effect of SKN treatment on the expression of LDHA (**C**), PDK1 (**D**) and GLUT1 (**E**). The expression of LDHA, PDK1 and GLUT1 was measured by RT-qPCR. The data are representative of 4 independent experiments (mean  $\pm$  SD). \**P* < 0.05 versus DMSO, <sup>#</sup>*P*<0.05 versus TNF- $\alpha$  + DMSO, by 1-way ANOVA

**Fig. S17 Effect of the K336R mutation on TNF- $\alpha$ -induced expression of STAT5A in RA FLSs.** Data (B) are expressed as the mean  $\pm$  SD of densitometry quantification of Western blot results from 3 independent experiments. \**P*<0.05 versus WT; <sup>#</sup>*P*<0.05 vs. TNF- $\alpha$  +WT, by 1-way ANOVA

**Fig. S18 Silencing efficiency of STAT5A siRNA.** RA FLSs were transfected with STAT5A siRNA 1–3 for 48 h and subjected to RT-qPCR analysis (A) and Western blot (B). A representative blot of 3 independent experiments is shown. The data shown are the mean  $\pm$  SD from 3 independent experiments. \**P* < 0.05 versus control siRNA (siC) by 1-way ANOVA

**Fig. S19 Effect of the SAE1/UBA2 inhibitor GA on frequencies of FLSs, T cells (CD3+) and macrophages (F4/80+) in synovial tissue from mice with CIA.** DBA/1J male mice were immunized with bovine type II collagen in CFA and administered a booster injection 21 d later to induce CIA. On the 22nd day, the mice were injected i.p. with GA (30 mg/kg/d) or DMSO (as a model control) daily for 21 d. The expression of FLS (vimentin), F4/80, CD3 and nuclei was evaluated by immunofluorescence staining using fluorescence microscopy. Representative images (left panel) and quantification of the percentage of synovial vimentin-, F4/80- and CD3-positive cells (right panel) of DMSO-treated (*n* = 8) and GA-treated (*n* =8) mice (original magnification, 400 $\times$ ). \**P* <

0.05 versus DMSO, by Student's *t* test

**Fig. S20 Expression of SAE1 and UBA2 in synovial T cells (CD3+) and macrophages (F4/80+) from mice with CIA.** DBA/1J male mice were immunized with bovine type II collagen in CFA and administered a booster injection 21 d later to induce CIA. On the 22nd day, the mice were injected i.p. with GA (30 mg/kg/d) or DMSO (as a model control) daily for 21 d. The expression of synovial CD3, F4/80, SAE1, UBA2 and nuclei was evaluated by immunofluorescence staining using fluorescence microscopy. Representative images (left panel) and quantification of the percentage of CD3+SAE1+, F4/80+SAE1+, CD3+UBA2+and F4/80+ UBA2+ cells (right panel) of DMSO-treated (n = 8) and GA-treated (n =8) mice (original magnification, 400×). \**P* < 0.05 versus DMSO, by Student's *t* test

**Fig.S1**

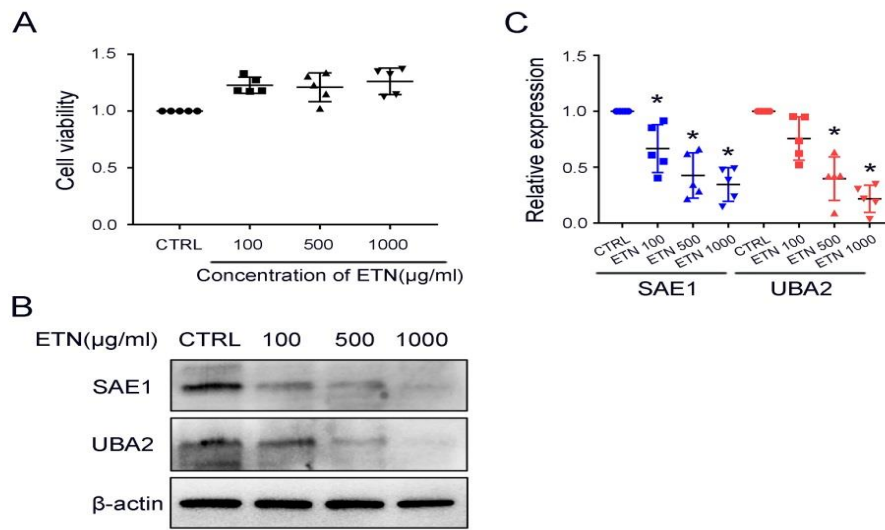

**Fig.S2**

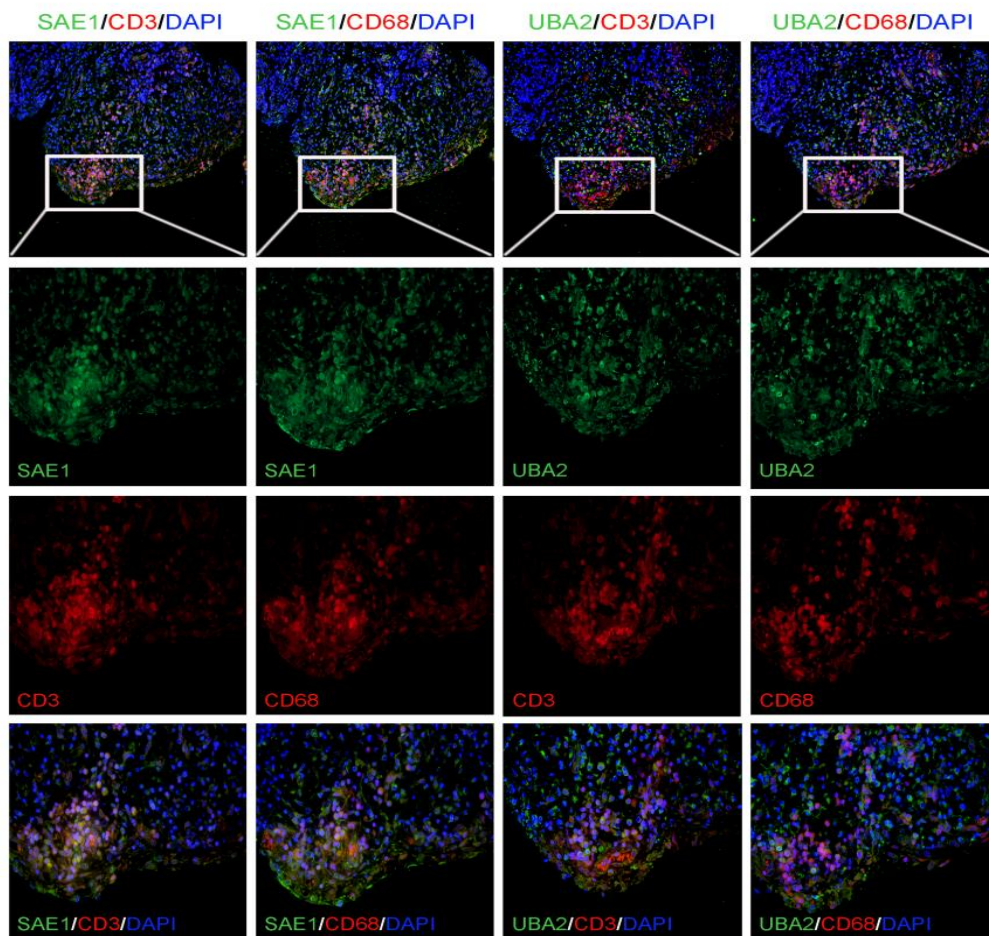

**Fig.S3**

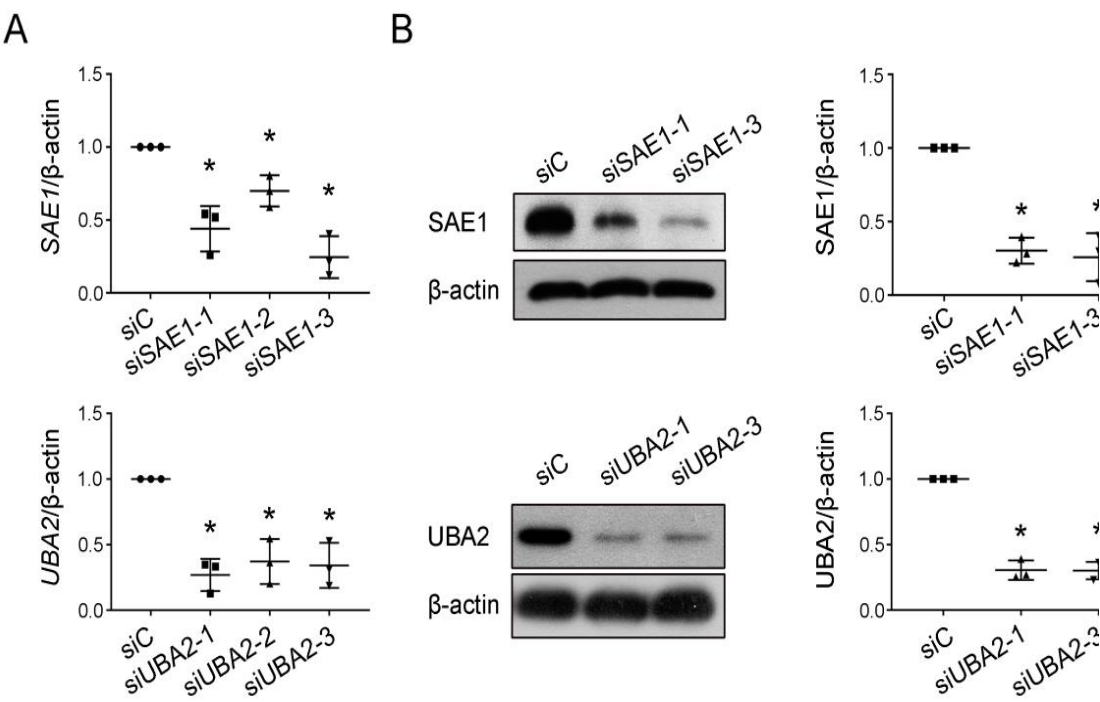

**Fig.S4**

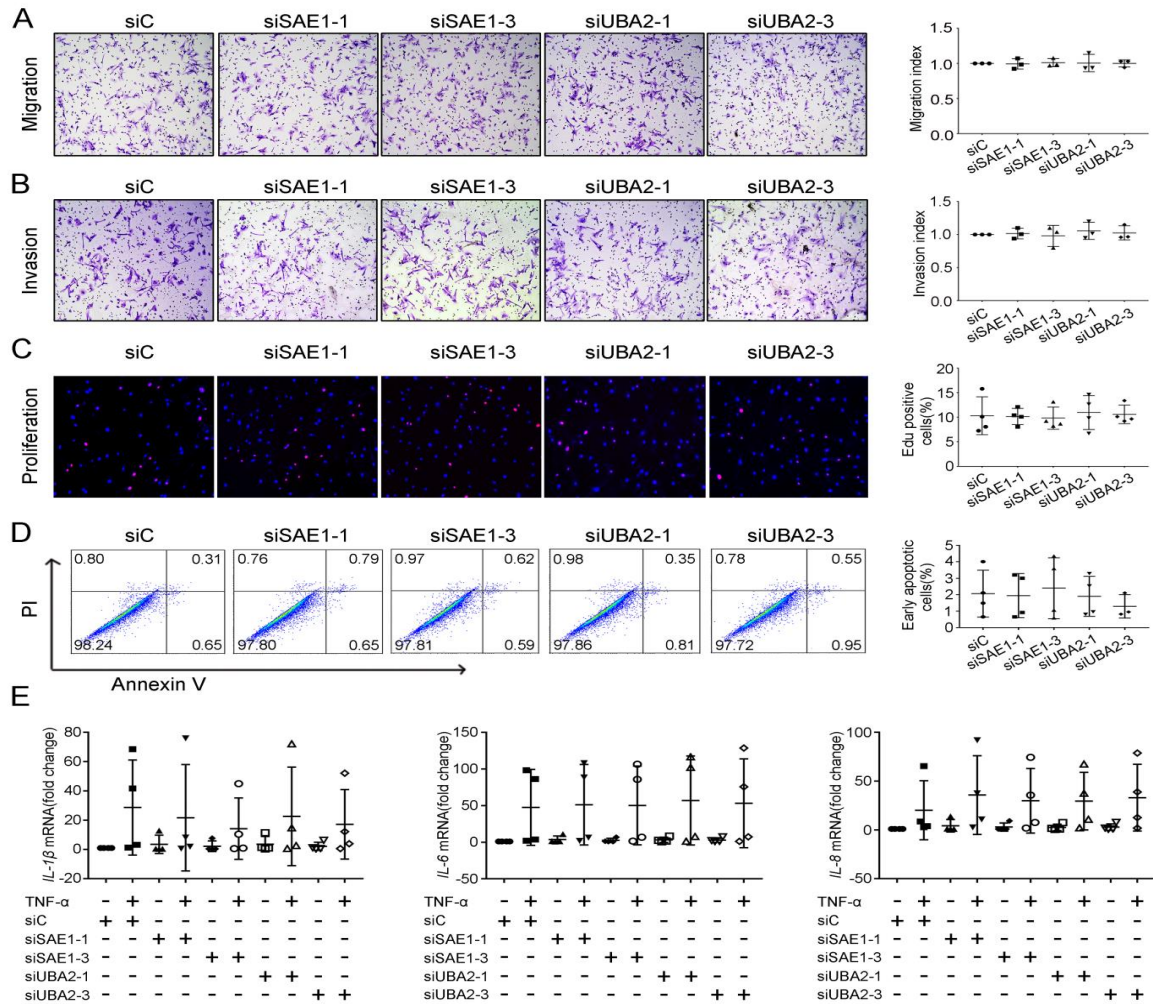

Fig.S5

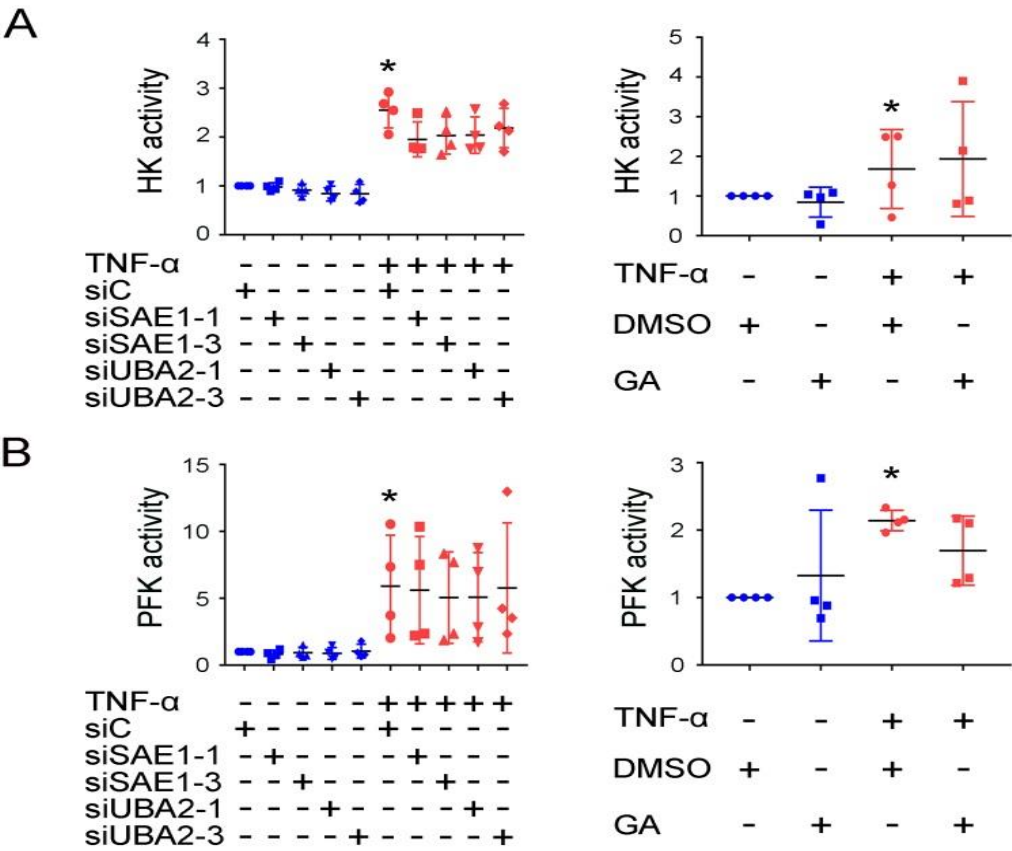

**Fig.S6**

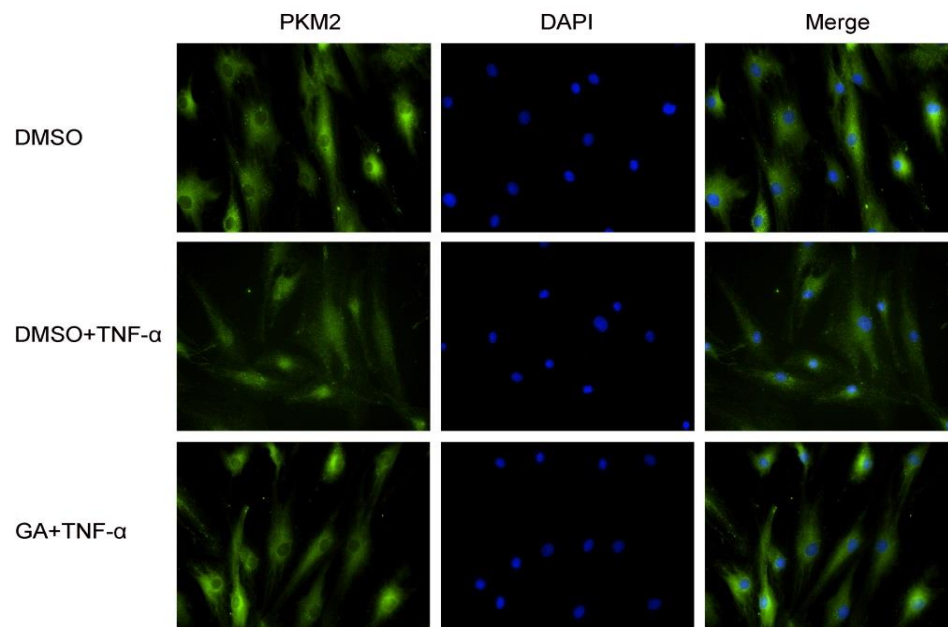

**Fig.S7**

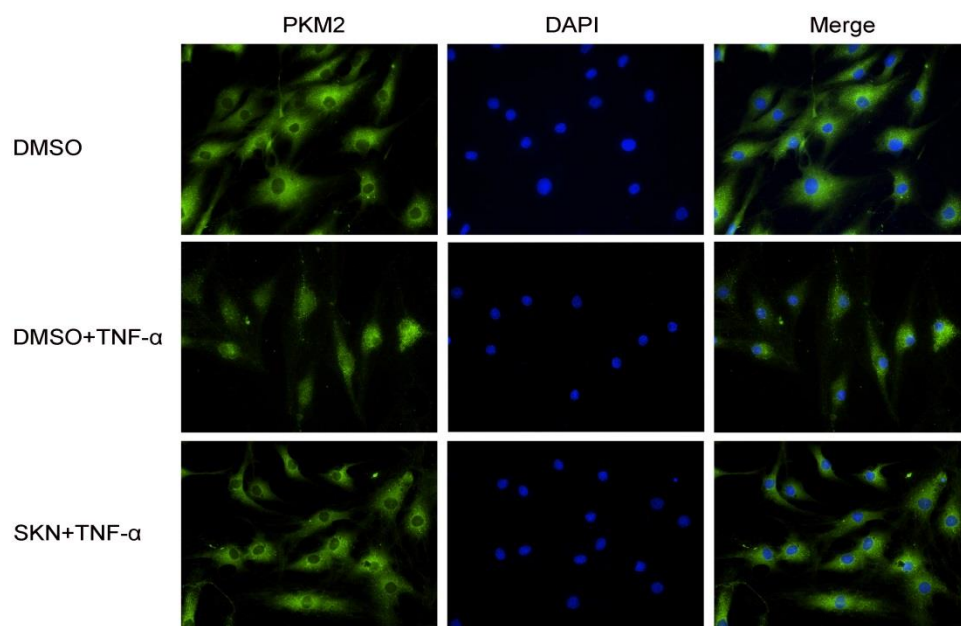

**Fig.S8**

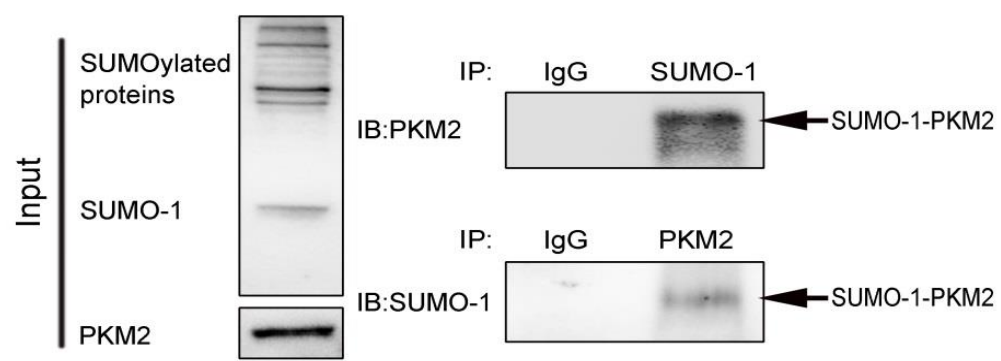

**Fig.S9**

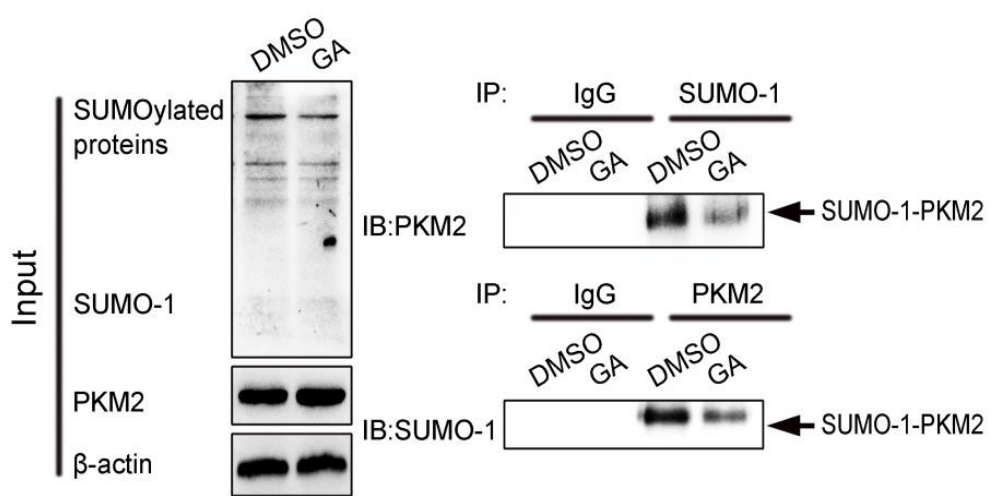

**Fig.S10**

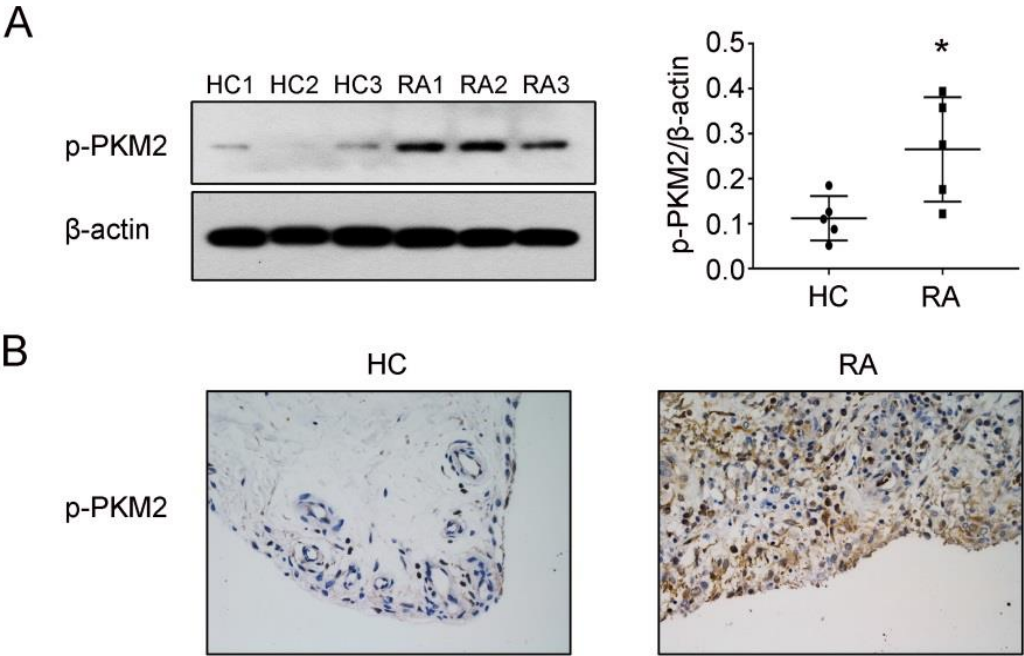

**Fig.S11**

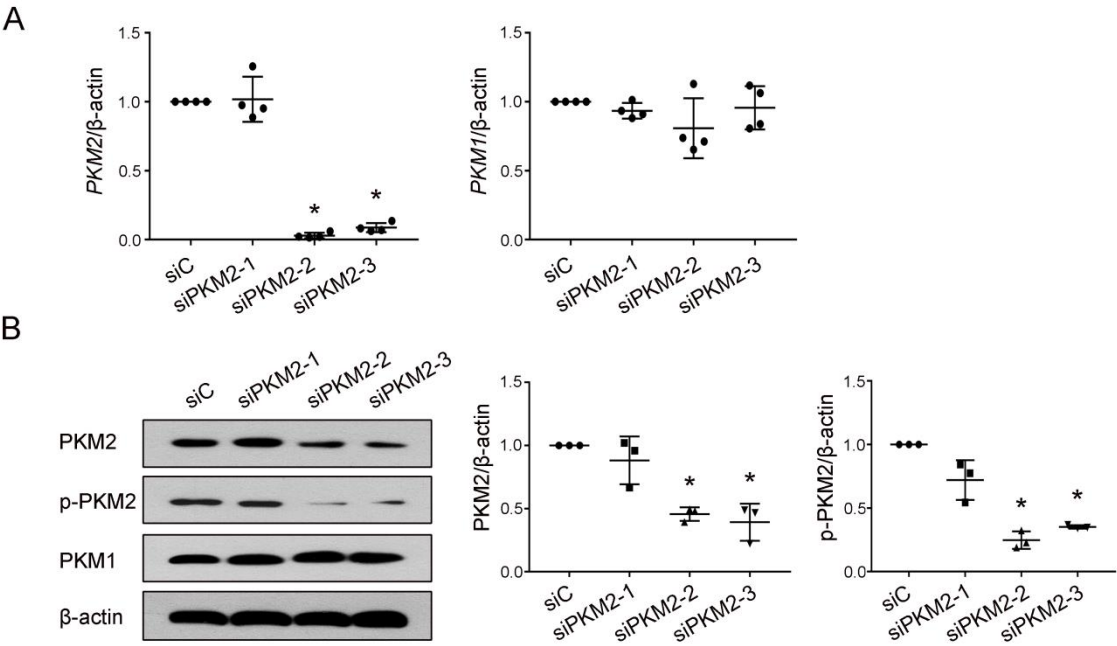

Fig.S12

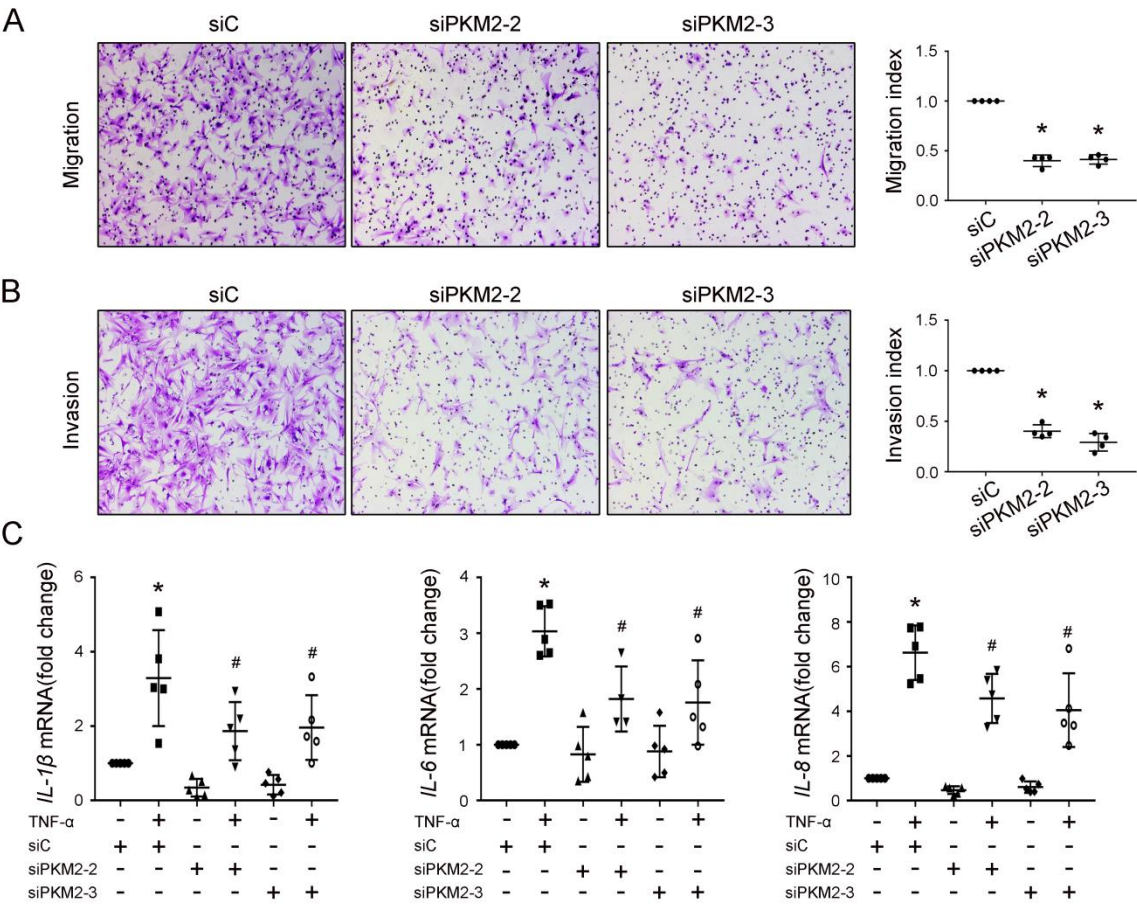

Fig.S13

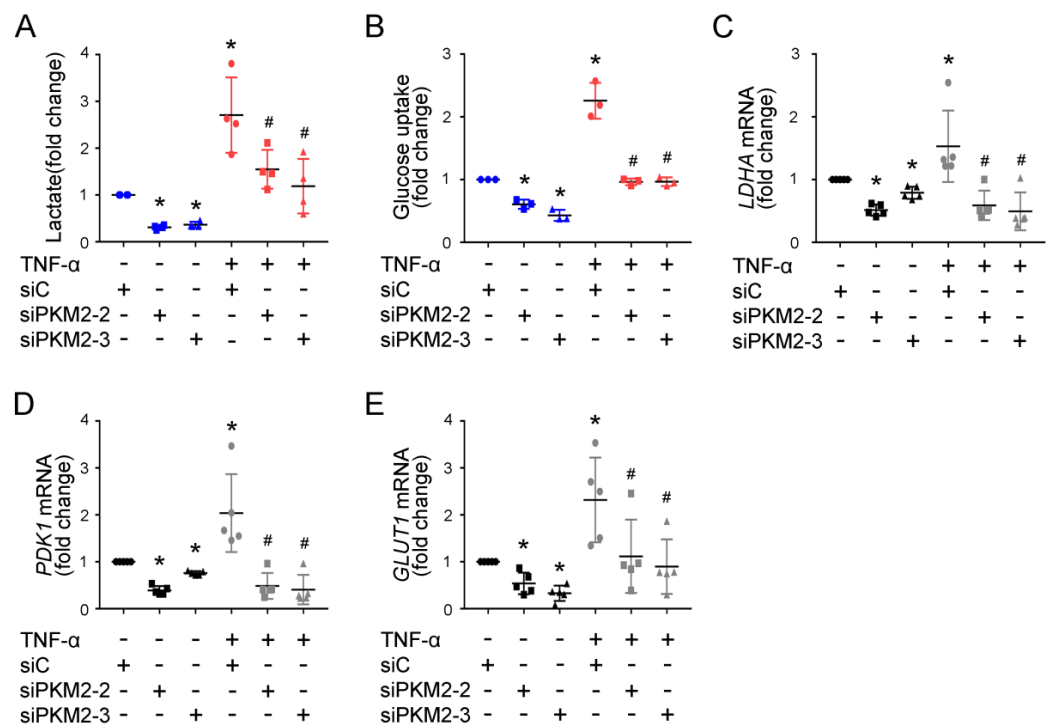

Fig.S14

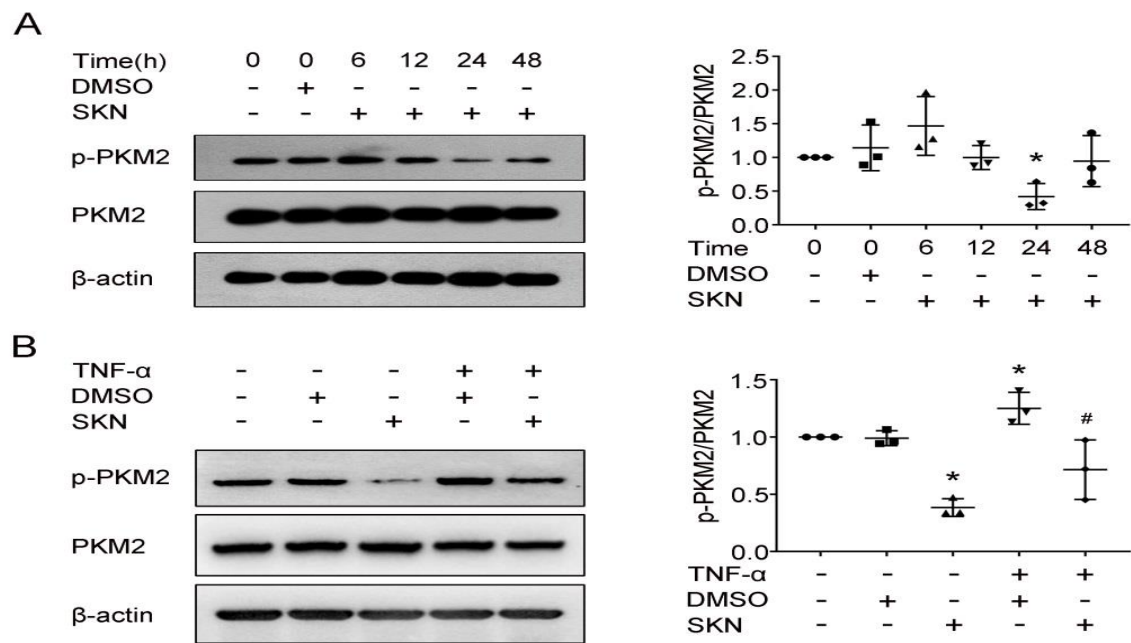

Fig.S15

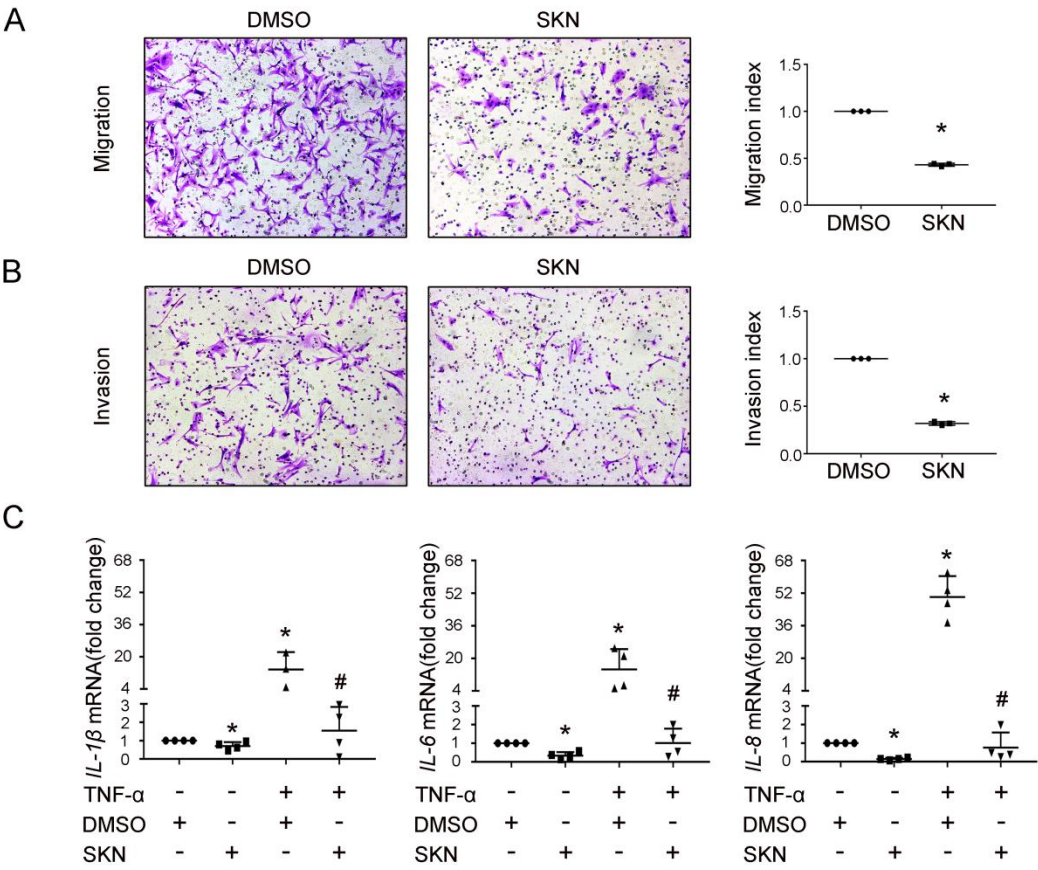

**Fig.S16**

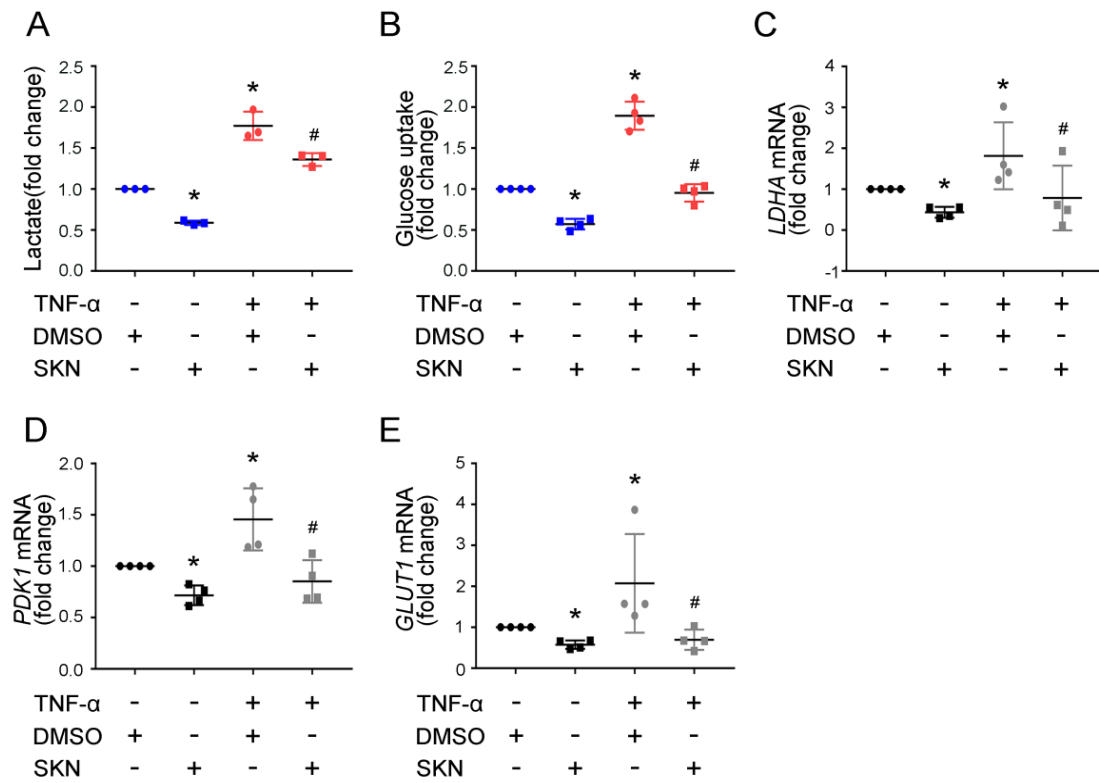

**Fig.S17**

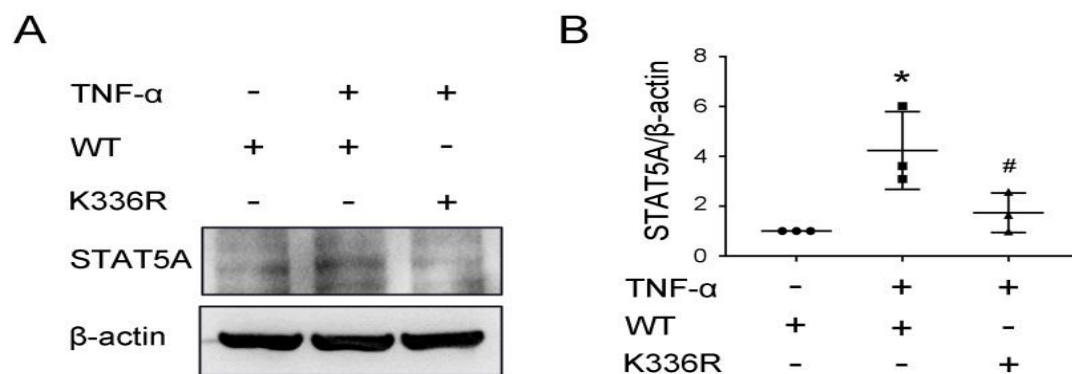

**Fig.S18**

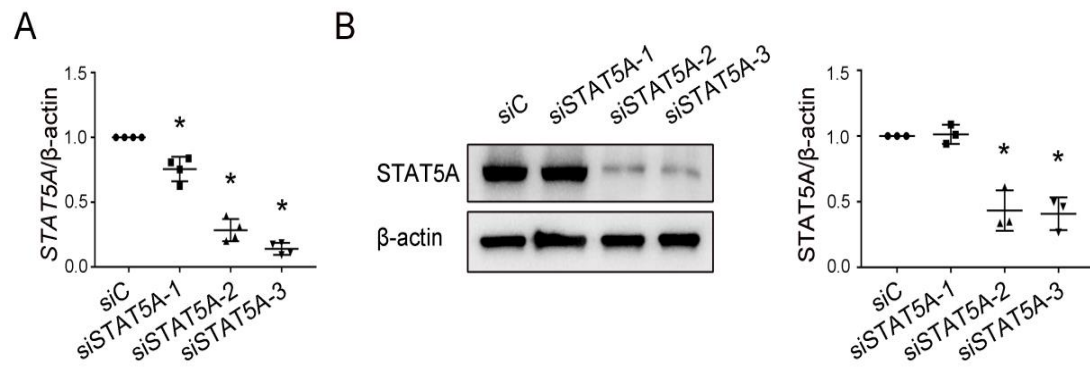

**Fig.S19**

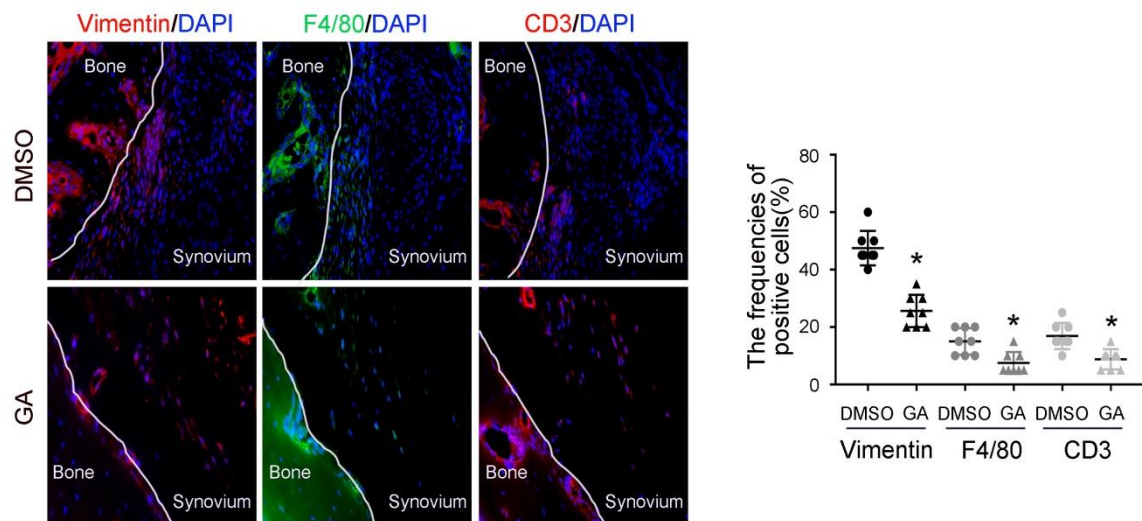

Fig.S20

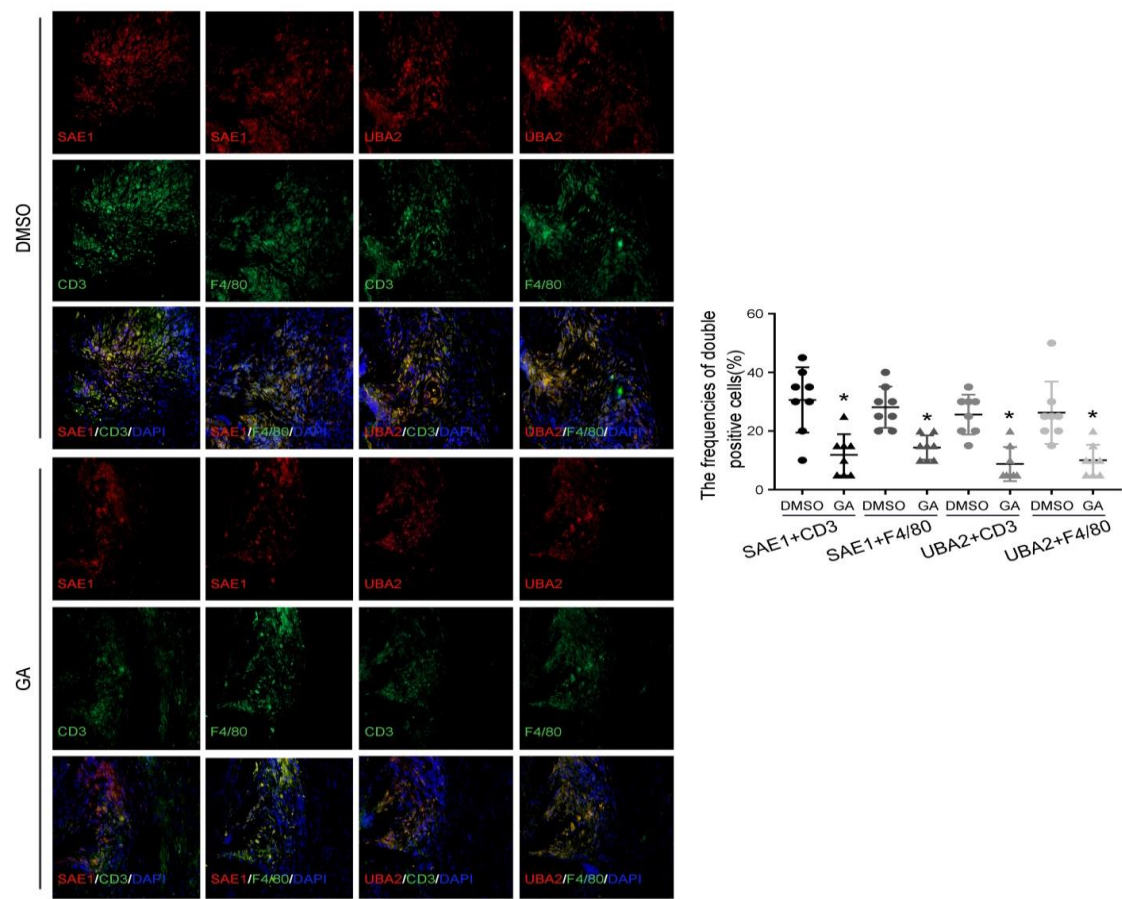

## Tables

**Table S1. Demographic and clinical features of patients with active RA.**

|                                          |           |
|------------------------------------------|-----------|
| Age, yrs (mean±SD)                       | 54.8±7.5  |
| Female, <i>n</i> (%)                     | 20 (83.3) |
| Male, <i>n</i> (%)                       | 4 (16.7)  |
| Disease duration, yrs (mean±SD)          | 6 (7.8)   |
| Rheumatoid factor-positive, <i>n</i> (%) | 20 (83.3) |
| Anti-CCP-positive, <i>n</i> (%)          | 16 (66.7) |
| DAS28 (CRP) (mean±SD)                    | 5.4 ± 1.5 |
| Previous medications, <i>n</i> (%)       |           |
| Prednisone (<10mg/d)                     | 12 (50)   |
| Methotrexate                             | 10 (41.6) |
| Leflunomide                              | 4 (16.7)  |
| Sulfasalazine                            | 3 (12.5)  |
| Hydroxychloroquine                       | 6 (25)    |

**Table S2 1 Sequences of primers and siRNA**

| <b>RT-qPCR primers</b> |         |                          |
|------------------------|---------|--------------------------|
| AHRR                   | Forward | AGGTGCCAGATTGAGTGGTG     |
|                        | Reverse | TTGCCGTTGAGGAAGGGATG     |
| ARHGAP11A              | Forward | ATATTGGGCGTGTACCAGATTTT  |
|                        | Reverse | CAATGTACGCTTAGCATTGGTG   |
| $\beta$ -actin         | Forward | TCAAGATCATTGCTCCTCCTGAG  |
|                        | Reverse | ACATCTGCTGGAAGGTGGACA    |
| CCL2                   | Forward | CAGCCAGATGCAATCAATGCC    |
|                        | Reverse | TGGAATCCTGAACCCACTTCT    |
| GLUT1                  | Forward | ATACACCACCTCACTCCTGTT    |
|                        | Reverse | CCATCCAAACCTCCTACCT      |
| HK1                    | Forward | TGGCTCATTTCCACCTCACC     |
|                        | Reverse | GCATTGTTGTGCGTCTGCTT     |
| HK2                    | Forward | TGCCACCAGACTAAACTAGACG   |
|                        | Reverse | CCCGTGCCCAATGAGAC        |
| HK3                    | Forward | TGAGGGGCATAGGGTGGAG      |
|                        | Reverse | GTGGGCAGCAAAGTCAAAGAG    |
| HK4                    | Forward | CAGGTCACAGAAGGGAGAGG     |
|                        | Reverse | CTGGTTTGGGGTTTGAGGT      |
| IL-1 $\beta$           | Forward | ATGATGGCTTATTACAGTGGCAA  |
|                        | Reverse | GTCGGAGATTCGTAGCTGGA     |
| IL-6                   | Forward | ACTCACCTCTTCAGAACGAATTG  |
|                        | Reverse | CCATCTTTGGAAGGTTCAAGTTG  |
| IL-8                   | Forward | ACTGAGAGTGATTGAGAGTGGAC  |
|                        | Reverse | AACCCTCTGCACCCAGTTTTC    |
| LDHA                   | Forward | GTGTGCCTGTATGGAGTGGGA    |
|                        | Reverse | AGGATGTGTAGCCTTTGAGTTTG  |
| PDK1                   | Forward | CCAAGACCTCGTGTGAGACC     |
|                        | Reverse | AATACAGCTTCAGGTCTCCTTGG  |
| PFKL                   | Forward | CTCGTGGAGGGAGGTGAGAA     |
|                        | Reverse | TGACGCACAGGTTGGTGATG     |
| PFKM                   | Forward | GGAGATGCCCAAGGTATGAATG   |
|                        | Reverse | CACCCCAATGACACAGAGA      |
| PFKP                   | Forward | CGCCTACCTCAACGTGGTG      |
|                        | Reverse | ACCTCCAGAACGAAGGTCCTC    |
| PKL                    | Forward | CAGACCCACAGAGAGGGAGA     |
|                        | Reverse | TCAATGTCCAGTAGGCAGAGG    |
| PKM1                   | Forward | CGAGCCTCAAGTCACTCCAC     |
|                        | Reverse | GTGAGCAGACCTGCCAGACT     |
| PKM2                   | Forward | ATTATTTGAGGAACTCCGCCGCCT |

|        |         |                         |
|--------|---------|-------------------------|
| PKR    | Reverse | ATTCCGGGTCACAGCAATGATGG |
|        | Forward | GGATGGATGCTGGGGAGAAG    |
| SAE1   | Reverse | GCTCTTGGTTTGTGTGTGGG    |
|        | Forward | GTGAAAGGACTGACCATGCTG   |
| STAT5A | Reverse | CCCAGTACGAATCAAGAACTGAG |
|        | Forward | GCAGAGTCCGTGACAGAGG     |
| SUMO-1 | Reverse | CCACAGGTAGGGACAGAGTCT   |
|        | Forward | TGACCAGGAGGCCAAAACCTTC  |
| THAP6  | Reverse | AATTCATTGGAACACCCTGTCTT |
|        | Forward | AGGACTGACATTTACGTATTCC  |
| UBA2   | Reverse | CCGGCTGCATTACATCAA      |
|        | Forward | GTTTCTCCACATCGACCTGAT   |
|        | Reverse | GGCAACCTGTGCCTTTGATCTT  |

| siRNA  |         |                       |
|--------|---------|-----------------------|
| PKM2   | siRNA-1 | CATCTACCACTTGCAATTA   |
|        | siRNA-2 | CCATAATCGTCCTCACCAA   |
|        | siRNA-3 | CTACCACTTGCAATTATTTGA |
| SAE1   | siRNA-1 | AGACAACGATGGTCAAAAA   |
|        | siRNA-2 | GTGCTTCTTGTCGGCTTGA   |
|        | siRNA-3 | AGCGAGCTCAGAATCTCAA   |
| STAT5A | siRNA-1 | TCCGGCACATTCTGTACAA   |
|        | siRNA-2 | GAACTCTTACGCCGACCAA   |
|        | siRNA-3 | TCTTGTTGCGCTTTAGTGA   |
| SUMO-1 | siRNA-1 | CTGGGAATGGAGGAAGAAG   |
|        | siRNA-2 | CAATGAATTCACTCAGGTT   |
|        | siRNA-3 | CAAGAACTCAAAGAATCA    |
| UBA2   | siRNA-1 | CCGACAGTTTATACTGGTT   |
|        | siRNA-2 | CAAAGAGGTCACGTATAGA   |
|        | siRNA-3 | CATCGAGACTTTGAGAGTT   |

**Table S3 Effect of GA on body weight, blood glucose, liver and kidney functions of CIA mice (n=8)**

| Group | Weight(g)        | Blood glucose(mmol/L) | ALT(IU/L)        | AST(IU/L)        | Scr( $\mu$ mol/L) |
|-------|------------------|-----------------------|------------------|------------------|-------------------|
| DMSO  | 24.86 $\pm$ 2.15 | 10.18 $\pm$ 3.23      | 13.79 $\pm$ 4.57 | 13.11 $\pm$ 3.19 | 26.24 $\pm$ 9.48  |
| GA    | 25.31 $\pm$ 1.62 | 8.73 $\pm$ 2.95       | 10.85 $\pm$ 2.47 | 13.13 $\pm$ 3.82 | 24.62 $\pm$ 4.69  |

ALT-alanine aminotransferase, AST-aspartate aminotransferase, Scr-serum creatinine
